# Supplementary material for: Molecularly imprinted polymer-coated paper as a substrate for highly sensitive analysis using paper spray mass spectrometry: quantification of metabolites in urine
Source: Royal Society of Chemistry journal article supplement (doi:10.1039/c7ay01648d), 2017-01-01
Supplement: c7ay01648d1.pdf [file c7ay01648d1.pdf]

1

**SUPPLEMENTARY MATERIAL**

2

3 **MOLECULARLY IMPRINTED POLYMER – COATED PAPER AS**  
4 **SUBSTRATE FOR HIGH SENSITIBILITY ANALYSIS USING PAPER SPRAY**  
5 **MASS SPECTROMETRY: QUANTIFICATION OF METABOLITES IN URINE.**

6 Thais P. P. Mendes, Igor Pereira, Marcella Rodrigues Ferreira, Andréa Rodrigues Chaves,  
7 Boniek Gontijo Vaz\*

8 Federal University of Goiás, Samambaia Campus, Chemistry Institute, Avenida  
9 Esperança, s/n Campus Universitário, 74690-900, Goiânia – GO, Brazil.

10 \*email: [boniek@ufg.br](mailto:boniek@ufg.br)

11

12

13

14

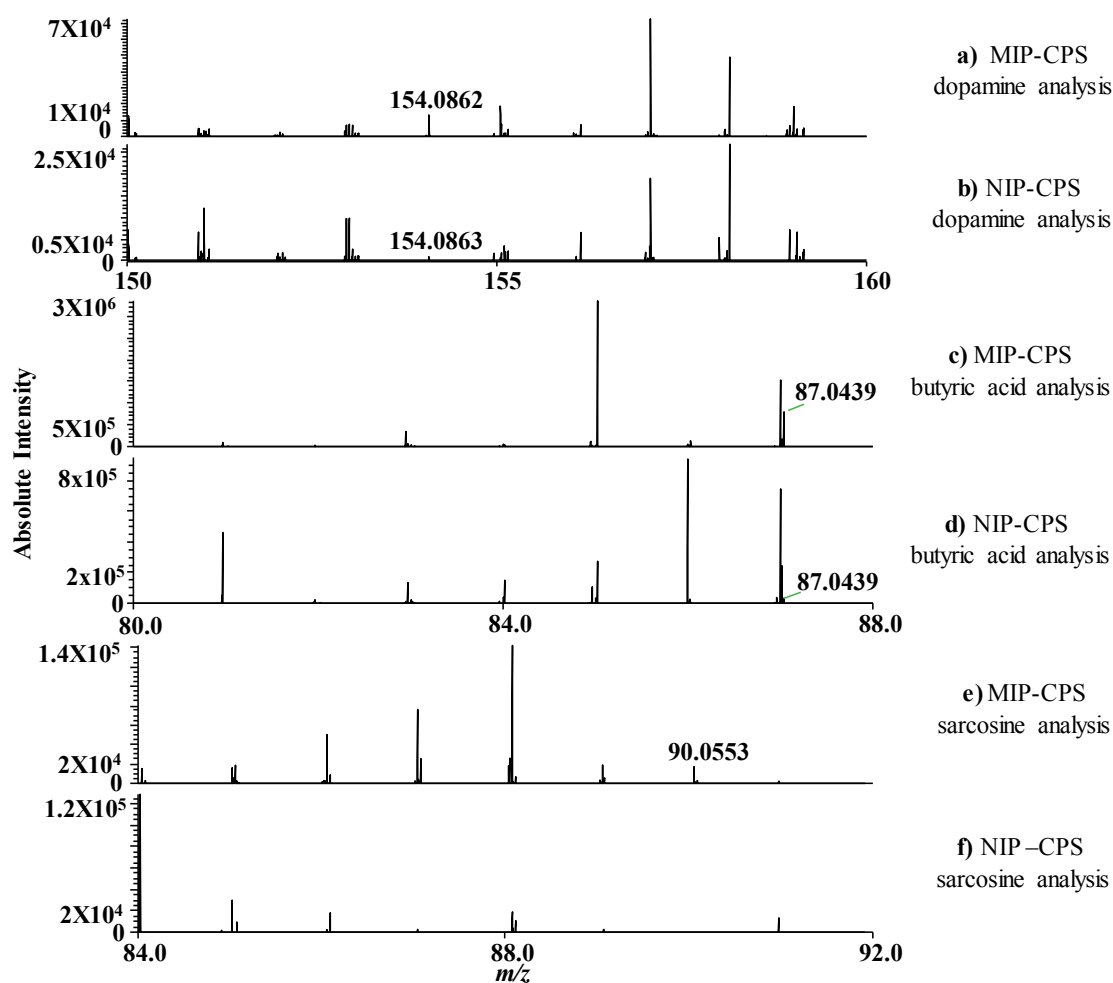

15

16 **Fig. S-1.** PSI(+) mass spectra for dopamine ( $1000 \mu\text{g L}^{-1}$ ) from artificial urine using (a)  
 17 MIP-CPS and (b) NIP-CPS. PSI(-) mass spectra for butyric acid ( $100 \mu\text{g L}^{-1}$ ) from  
 18 artificial urine using (c) MIP-CPS and (d) NIP-CPS. PSI(+) mass spectra for sarcosine  
 19 ( $100 \mu\text{g L}^{-1}$ ) from artificial urine using (e) MIP-CPS and (f) NIP-CPS. Dopamine was  
 20 detected as  $[\text{M}+\text{H}]^+$  of  $m/z$  154 butyric acid as  $[\text{M}-\text{H}]^-$  of  $m/z$  87 and sarcosine as  $[\text{M}+\text{H}]^+$   
 21 of  $m/z$  90.

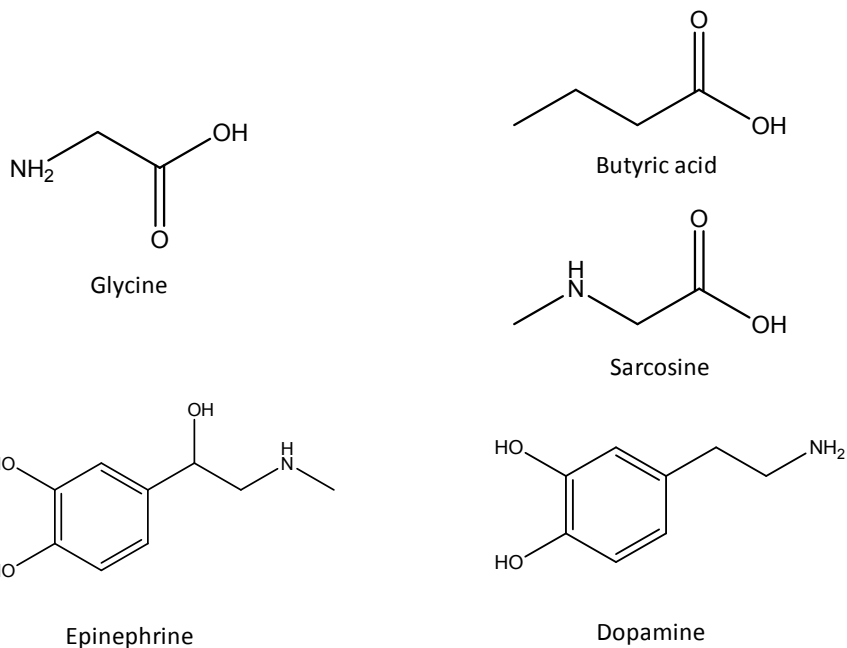

22

23 **Fig. S-2.** Molecular structure of templates (Glycine and Epinephrine) and target analytes  
 24 (Butyric acid, sarcosine and dopamine).

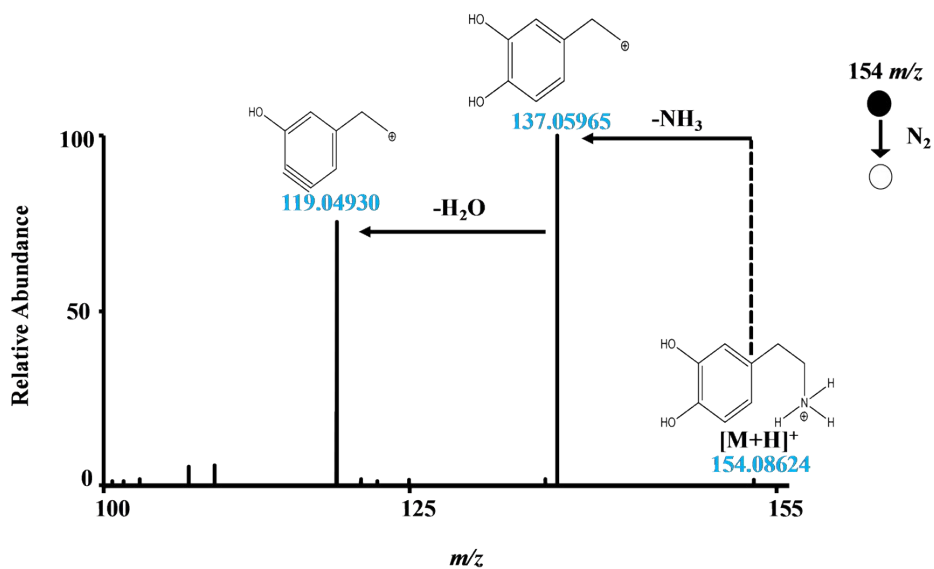

25

26 **Fig. S-3.** PS (+) MS/MS for DA at  $1000 \mu\text{g L}^{-1}$  from artificial urine using MIP-CPS.

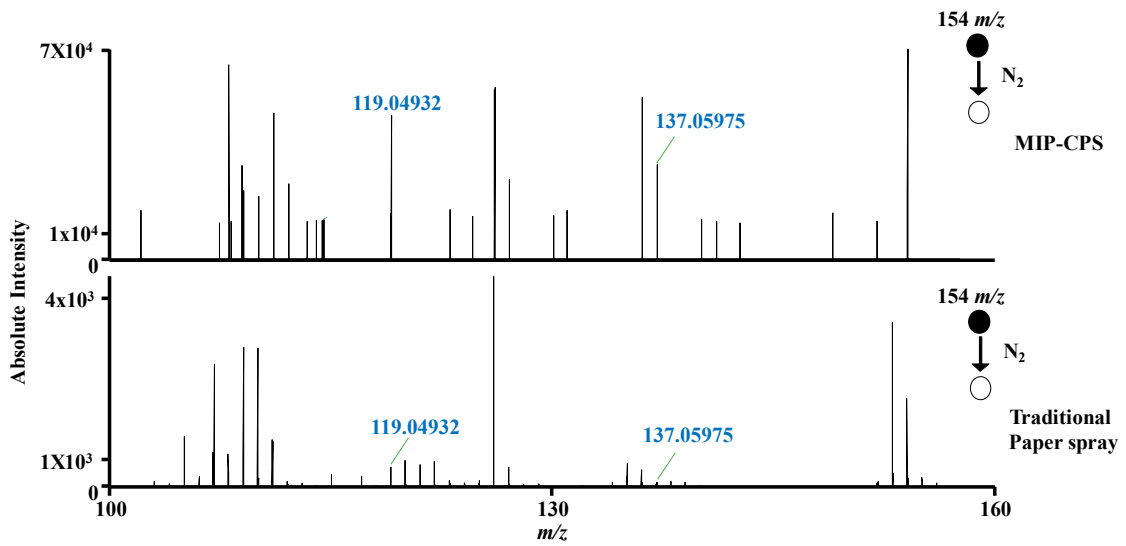

27  
 28 **Fig. S-4.** PS (+) MS/MS for DA from artificial urine using MIP-CPS and traditional paper  
 29 spray.

30
